# Supplementary material for: Integrative Analysis of Cytokine and Lipidomics Datasets Following Mild Traumatic Brain Injury in Rats
Source: MDPI journal article supplement (doi:10.3390/metabo14030133), 2024-02-21
Supplement: s1 [file s1]

*Supplementary Information*

# **Integrative Analysis of Cytokine and Lipidomics Datasets Following Mild Traumatic Brain Injury in Rats**

**Alexis N. Pulliam**<sup>1,2</sup>, **Alyssa F. Pybus**<sup>1,2</sup>, **David A. Gaul**<sup>2,3</sup>, **Samuel G. Moore**<sup>2,3</sup>, **Levi B. Wood**<sup>1,2,4</sup>,  
**Facundo M. Fernández**<sup>2,3</sup> and **Michelle C. LaPlaca**<sup>1,3,\*</sup>

<sup>1</sup> Coulter Department of Biomedical Engineering, Georgia Institute of Technology/Emory University, Atlanta, GA 30332, USA; afpybus@gatech.edu (A.F.P.); levi.wood@me.gatech.edu (L.B.W.)

<sup>2</sup> Petit Institute for Bioengineering and Bioscience, Georgia Institute of Technology, Atlanta, GA 30332, USA

<sup>3</sup> School of Chemistry and Biochemistry, Georgia Institute of Technology, Atlanta, GA 30332, USA

<sup>4</sup> George W. Woodruff School of Mechanical Engineering, Georgia Institute of Technology, Atlanta, GA 30332, USA

\* Correspondence: michelle.laplaca@bme.gatech.edu

**Table S1.** Experimental sample numbers and righting latency

| <b>Injury Group</b>                        | <b>Male</b>       | <b>Female</b>     | <b>Combined</b>   | <b>Comparisons</b>                                                                                                                                                                  |
|--------------------------------------------|-------------------|-------------------|-------------------|-------------------------------------------------------------------------------------------------------------------------------------------------------------------------------------|
| Sham control                               | N= 9              | N= 9              | N= 18             |                                                                                                                                                                                     |
| Righting latency (min)<br>(mean $\pm$ SEM) | 2.536 $\pm$ 0.339 | 2.224 $\pm$ 0.477 | 2.384 $\pm$ 0.276 | <sup>2</sup> sham: male vs. female; p=0.8102                                                                                                                                        |
| 1X                                         | N= 8              | N= 9              | N= 17             |                                                                                                                                                                                     |
| Righting latency (min)<br>(mean $\pm$ SEM) | 3.281 $\pm$ 0.353 | 2.890 $\pm$ 0.352 | 3.074 $\pm$ 0.247 | <sup>1</sup> Sham vs. 1X; p=0.7206<br><sup>2</sup> Male: sham vs. 1X; p=0.8415<br><sup>2</sup> Female: sham vs. 1X; p= 0.8564<br><sup>2</sup> 1X: male vs. female; p=0.7631         |
| 3X                                         | N= 10             | N= 9              | N= 19             |                                                                                                                                                                                     |
| Righting latency (min)<br>(mean $\pm$ SEM) | 7.427 $\pm$ 1.132 | 5.543 $\pm$ 1.097 | 6.401 $\pm$ 0.795 | <sup>1</sup> Sham vs. 3X****; p<0.0001<br><sup>2</sup> Male: sham vs. 3X***; p=0.0007<br><sup>2</sup> Female: sham vs. 3X*; p= 0.0157<br><sup>2</sup> 3X: male vs. female; p=0.0895 |
|                                            | N=27              | N= 27             | N= 54             |                                                                                                                                                                                     |

Sample number and righting latency following mild TBI. <sup>1</sup> One-way ANOVA, Tukey's post-hoc multiple comparisons test. <sup>2</sup>Two-way ANOVA, Tukey's post-hoc multiple comparisons test. \*, P<0.05, \*\*P<0.01, \*\*\*,P<0.001, \*\*\*\*,P<0.0001

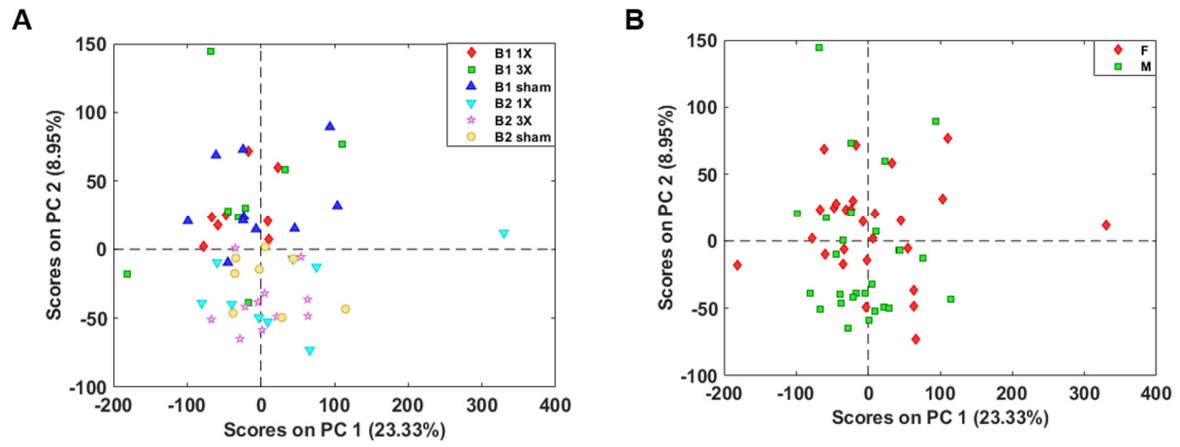

**Figure S1. 22,735 features detected by LC-MS** (A) PCA score plot depicts separation of batch 1 and batch 2 along PC2. Batch 1 samples are in upper quadrants. Batch 2 samples are in lower quadrants. (B) PCA score plot of all features indicate minimal separation between male and female samples.

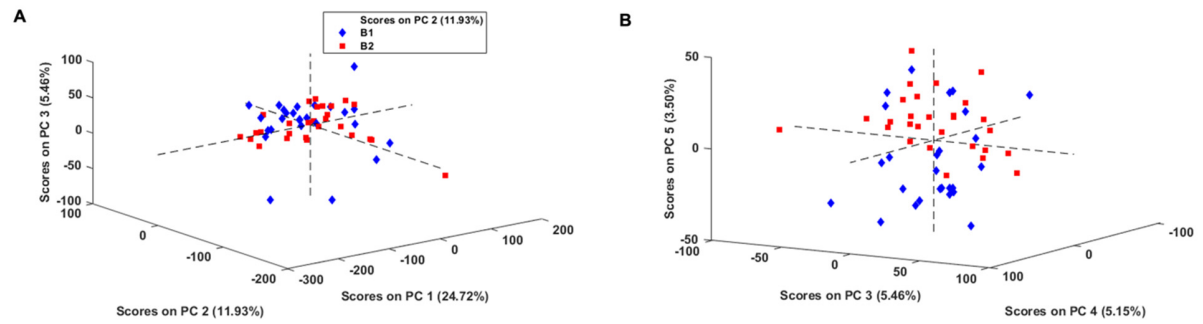

**Figure S2. Feature reduction to minimize batch effects with full dataset (A)** 3D-PCA score plot depicts no separation of batch 1 and batch 2 along PC1, 2, and 3. **(B)** 3D-PCA score plot of all features indicate separation of of batch 1 and 2 along PC5.

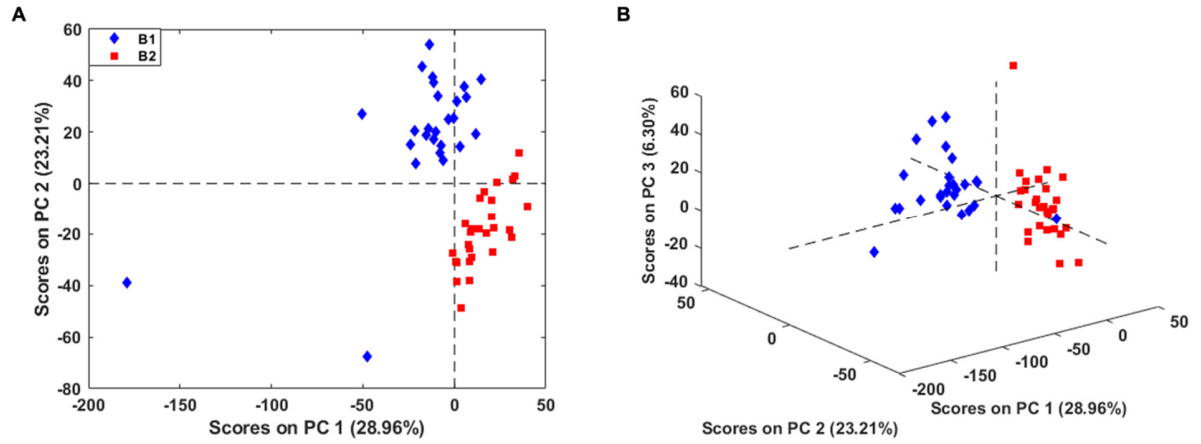

**Figure S3. 2,983 features with statistically significant difference between batches.** (A) 2-D PCA score plot show prominent separation of experimental batch 1 and 2 along PC 1 (B) 3-D PCA score plot show separation along PC1 and PC2. B1 denotes batch 1 and B2 denotes batch 2.

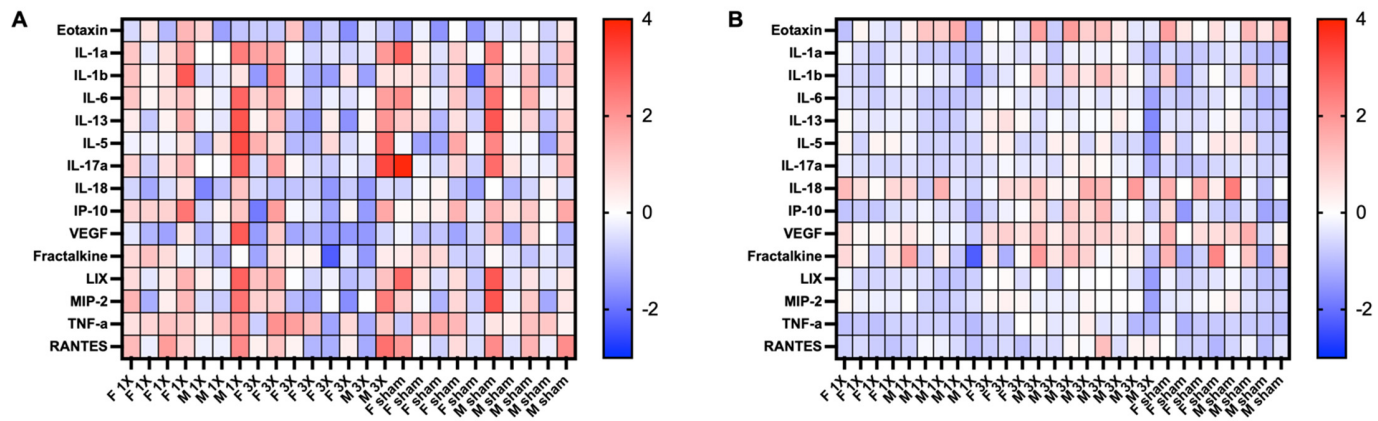

Figure S4. Heatmap of cytokine and chemokine expression z-scores. (A) batch 1 (B) batch 2.

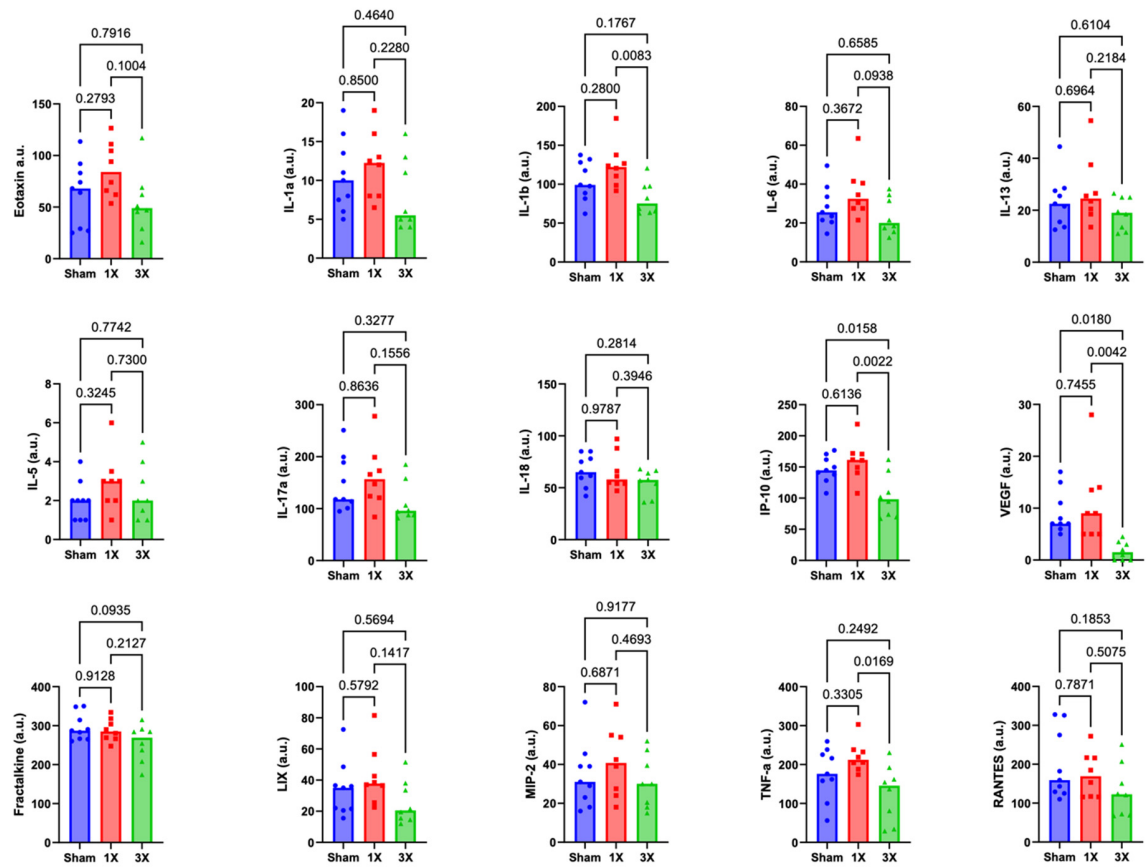

**Figure S5. Inflammation marker profiles in batch 1.** Data depict average cytokine and chemokine levels for each group. One-way ANOVA with Tukey's post-hoc, graph denotes mean.

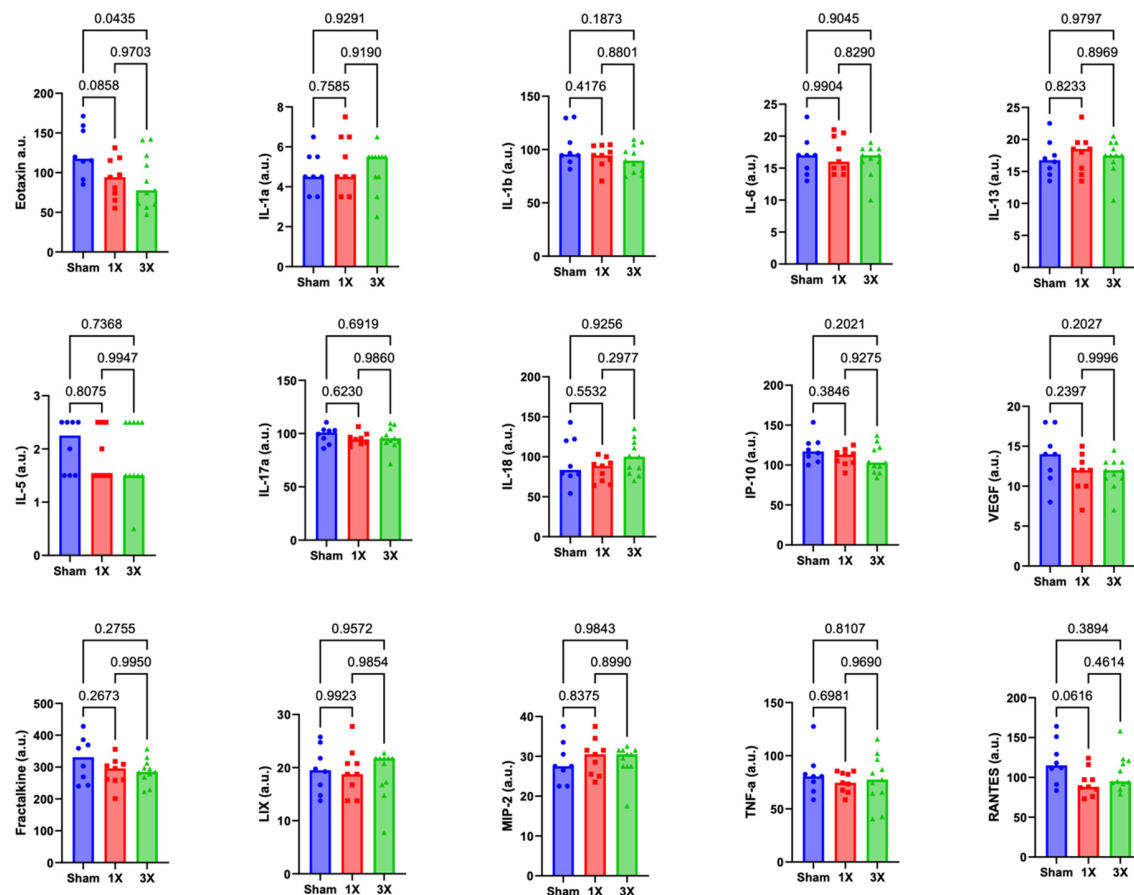

**Figure S6. Inflammation marker profiles in batch 2.** Data depict average cytokine and chemokine levels for each group. One-way ANOVA with Tukey's post-hoc, graph denotes mean.



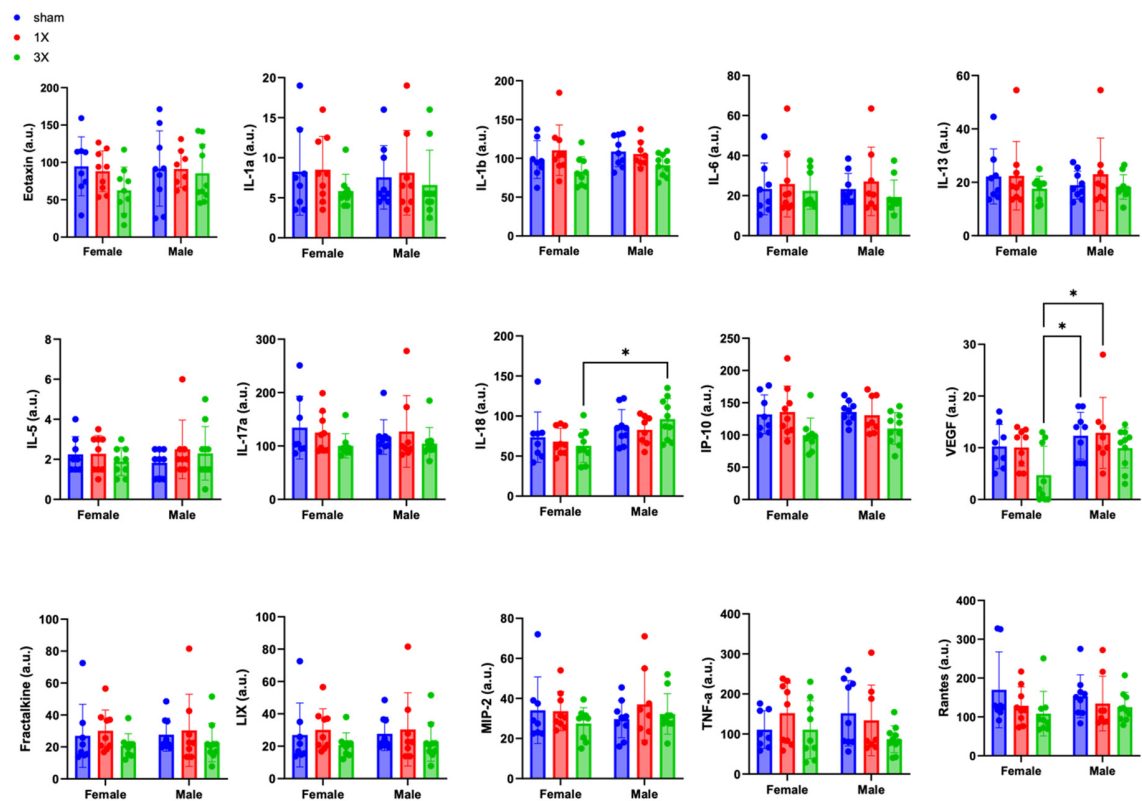

**Figure S7. Inflammation marker profiles in female and male groups.** Data depict average cytokine and chemokine levels for each injury group and sex. Two-way ANOVA with Tukey's post-hoc, graph denotes mean.
